# Supplementary material for: Metabolomics Response for Drought Stress Tolerance in Chinese Wheat Genotypes (Triticum aestivum)
Source: MDPI journal article supplement (doi:10.3390/plants9040520), 2020-04-17

### T2.vs.T1

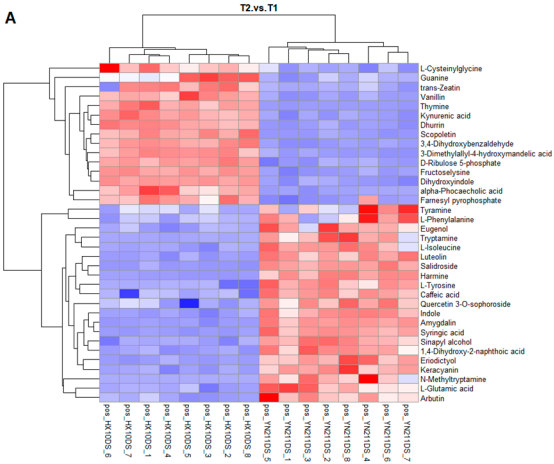

### T2.vs.T1

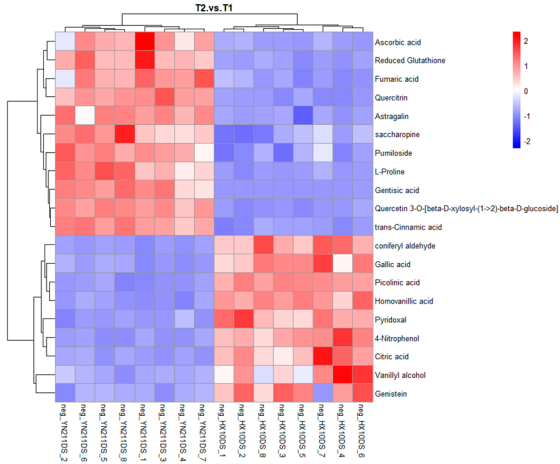

Supplement: s1 [file s1]
